# Supplementary material for: Tunable construction of CuS nanosheets@flower-like ZnCo-layered double hydroxide nanostructures for hybrid supercapacitors
Source: Royal Society of Chemistry journal article supplement (doi:10.1039/d3im00027c), 2023-01-01
Supplement: d3im00027c1.pdf [file d3im00027c1.pdf]

## Supporting Information

# Tunable construction of CuS nanosheets@flower-like ZnCo-layered double hydroxide nanostructures for hybrid supercapacitor

Akbar Mohammadi Zardkhoshoui\*, Ramtin Arian, and Saied Saeed Hosseiny Davarani\*

Department of Chemistry, Shahid Beheshti University, G. C., 1983963113, Evin, Tehran, Iran.

Corresponding authors: \*Tel: +98 21 22431661; Fax: +98 21 22431661; E-mail: [ss-hosseiny@sbu.ac.ir](mailto:ss-hosseiny@sbu.ac.ir) (S.S.H. Davarani); and [mohammadi.bahadoran@gmail.com](mailto:mohammadi.bahadoran@gmail.com) (A. Mohammadi Zardkhoshoui)

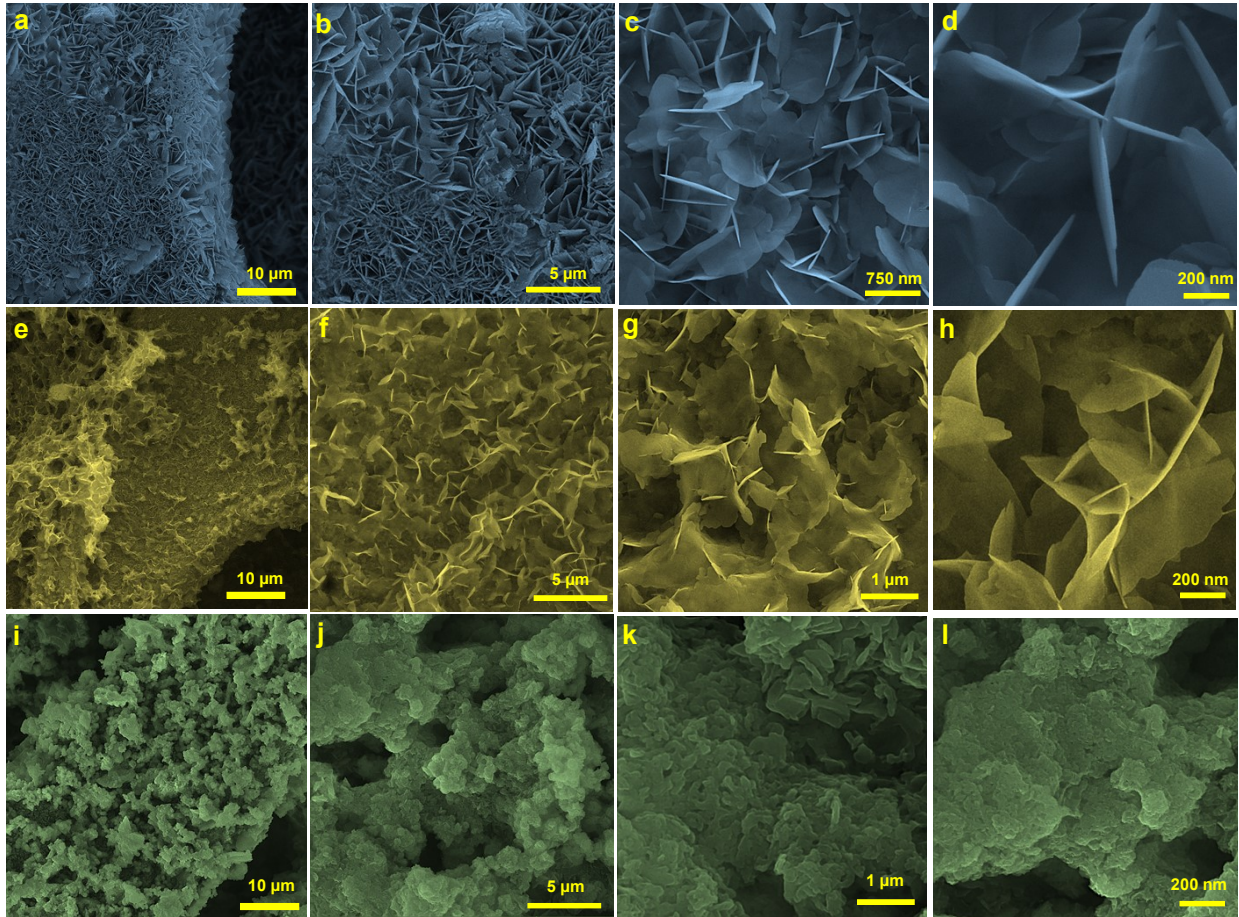

**Fig. S1** (a-d) FE-SEM images of the NF@CS5. (e-h) FE-SEM images of the NF@CS10. (i-l) FE-SEM images of the NF@CS15.

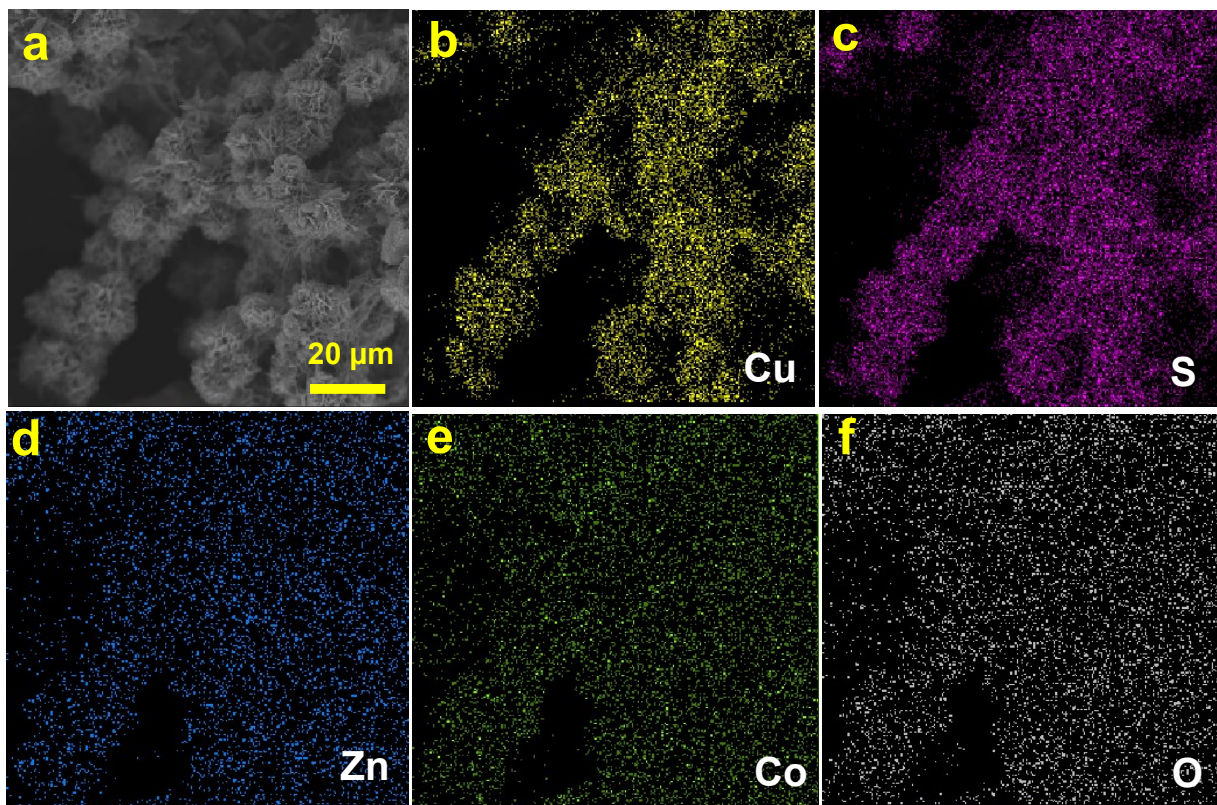

**Fig. S2** (a-f) FE-SEM mapping images of the NF@CS10-ZC-LDH4.

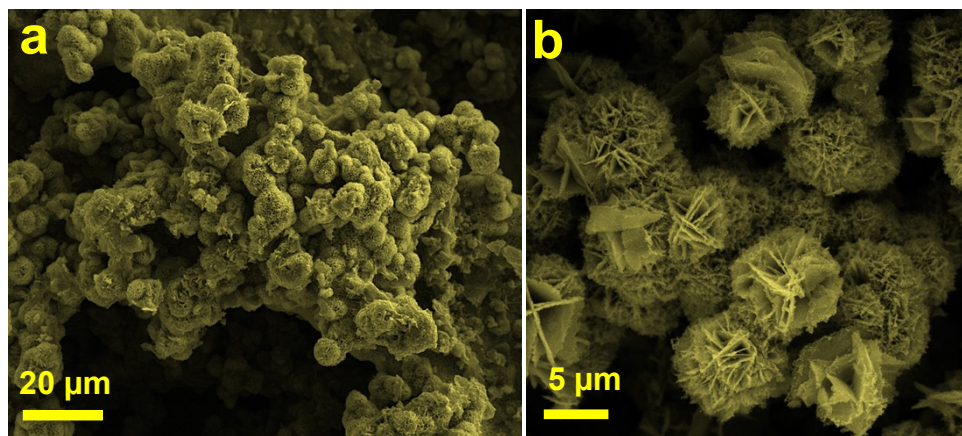

**Fig. S3** (a, b) FE-SEM images of the pure NF@ZC-LDH4.

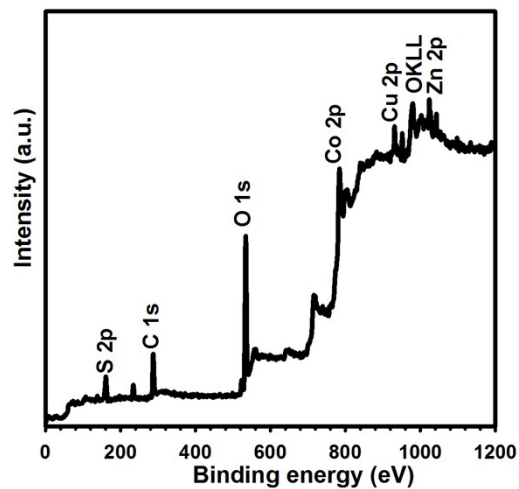

Fig. S4 XPS survey of the CS10-ZC-LDH4 sample.

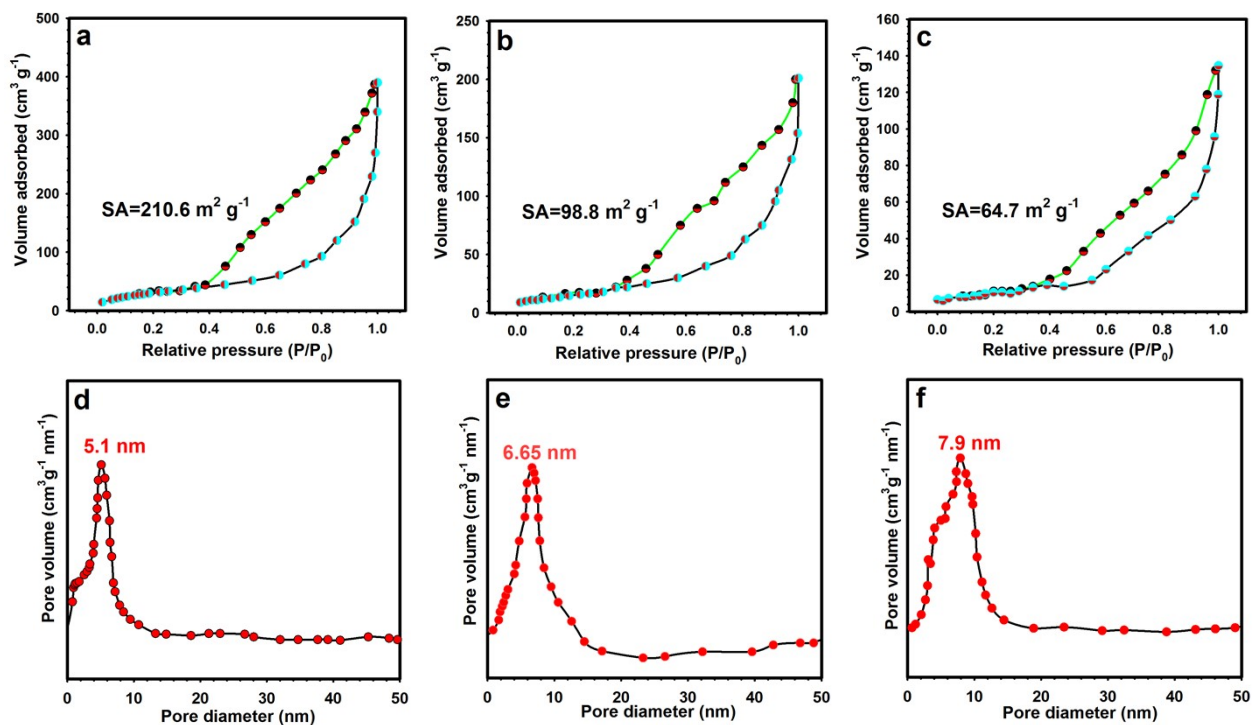

Fig. S5 (a) BET curve of the CS10-ZC-LDH4. (b) BET curve of the ZC-LDH4. (c) BET curve of the CS10. (d) BJH plot of the CS10-ZC-LDH4. (e) BJH plot of the ZC-LDH4. (f) BJH plot of the CS10.

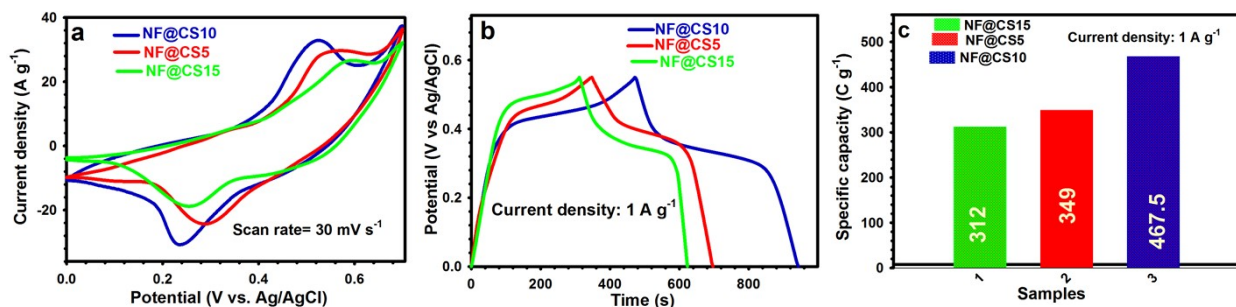

**Fig. S6** (a) CV plots of the NF@CS5, NF@CS10, and NF@CS15 electrodes at 30 mV s<sup>-1</sup>. (b) GCD curves of the NF@CS5, NF@CS10, and NF@CS15 electrodes at 1 A g<sup>-1</sup>. (c) Specific capacities of the NF@CS5, NF@CS10, and NF@CS15 electrodes at 1 A g<sup>-1</sup>.

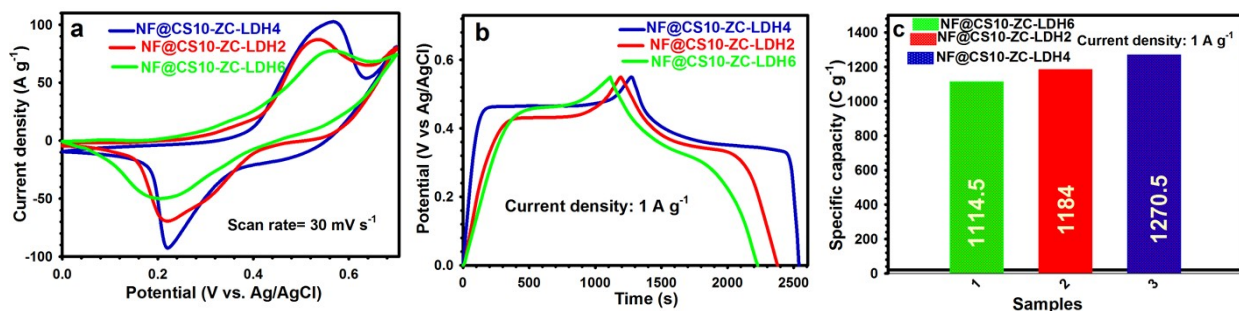

**Fig. S7** (a) CV plots of the NF@CS5-ZC-LDH2, NF@CS5-ZC-LDH4, and NF@CS5-ZC-LDH6 electrodes at 30 mV s<sup>-1</sup>. (b) GCD curves of the NF@CS5-ZC-LDH2, NF@CS5-ZC-LDH4, and NF@CS5-ZC-LDH6 electrodes at 1 A g<sup>-1</sup>. (c) Specific capacities of the NF@CS5-ZC-LDH2, NF@CS5-ZC-LDH4, and NF@CS5-ZC-LDH6 electrodes at 1 A g<sup>-1</sup>.

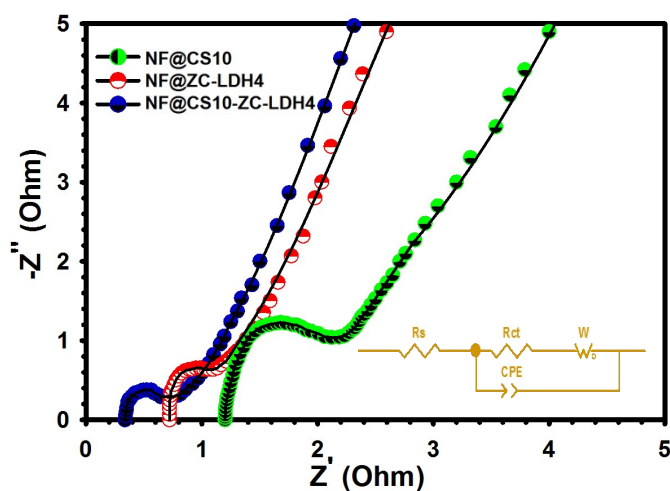

**Fig. S8** Nyquist plots of the NF@CS10, NF@ZC-LDH4, and NF@CS10-ZC-LDH4 electrodes (inset indicate the equivalent circuit model and magnified Nyquist curves).

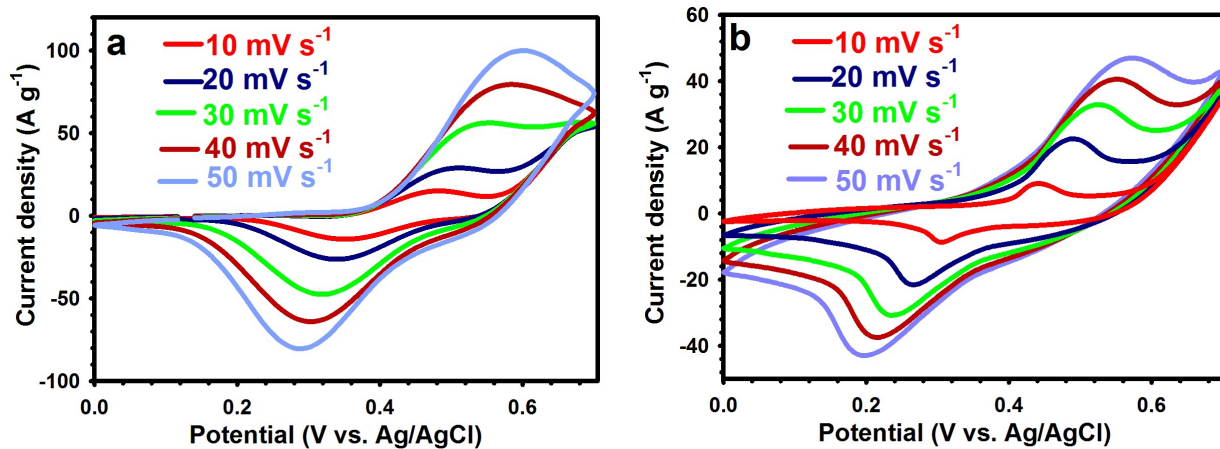

**Fig. S9** (a) CV curves of the NF@ZC-LDH4 electrode at various scan rates from 10 to 50  $\text{mV s}^{-1}$ . (b) CV curves of the NF@CS10 electrode at various scan rates from 10 to 50  $\text{mV s}^{-1}$ .

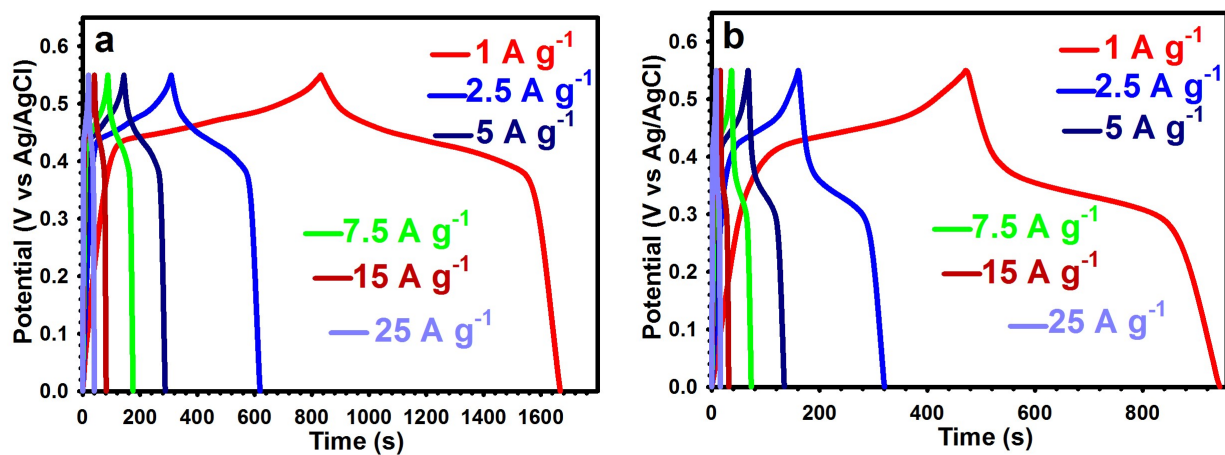

**Fig. S10** (a) GCD curves of the NF@ZC-LDH4 electrode from 1 to 25  $\text{A g}^{-1}$ . (b) GCD curves of the NF@CS10 electrode from 1 to 25  $\text{A g}^{-1}$ .

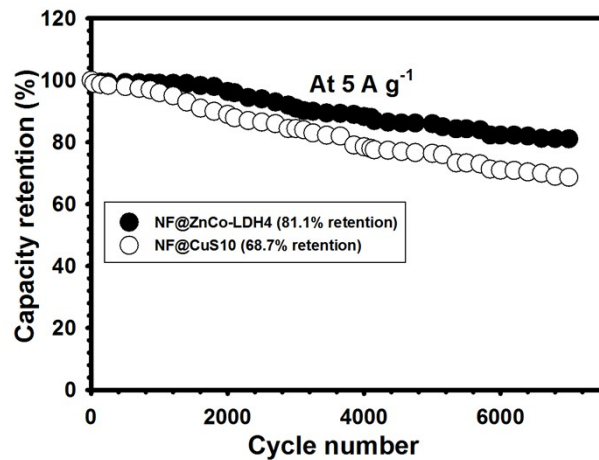

Fig. S11 Durability test of the NF@CuS10 and NF@ZC-LDH4 electrodes.

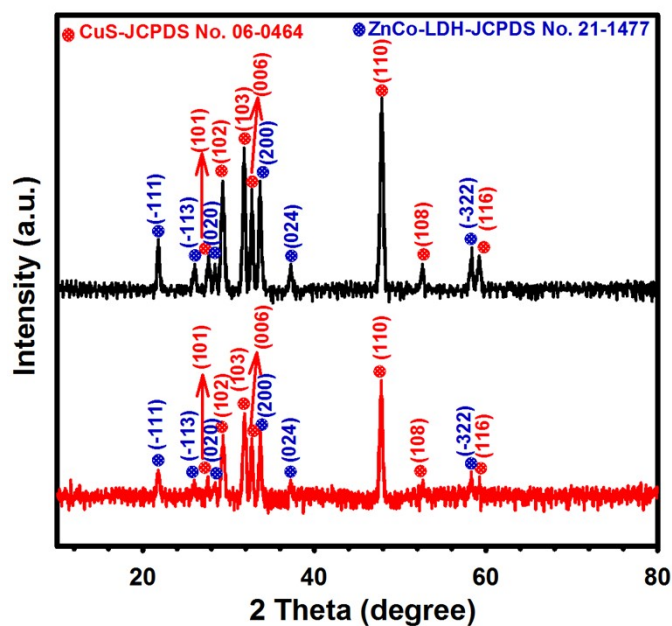

Fig. S12 XRD patterns of the CS10-ZC-LDH4 sample before and after durability test.

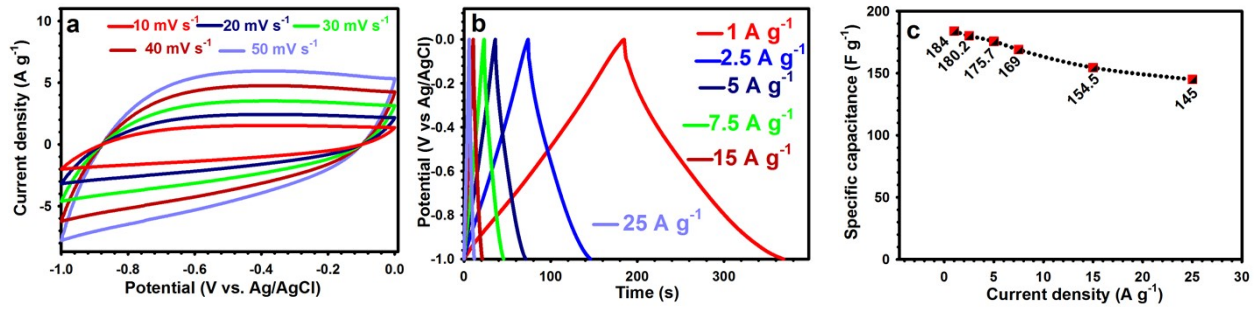

**Fig. S13** (a) CV plots of the NF@AC at various scan rates from 10 to 50 mV s<sup>-1</sup>. (b) GCD plots of the NF@AC@ at various current densities from 1 to 25 A g<sup>-1</sup>. (c) Rate capability of the NF@AC electrode.



**Table S1.** Comparison of the performance of the NF@CS10-ZC-LDH4 with other previously reported

| Composition                                                         | Capacity (C/g)                | Cycles, retention | Rate capability                | ED (Wh kg <sup>-1</sup> ) | Reference |
|---------------------------------------------------------------------|-------------------------------|-------------------|--------------------------------|---------------------------|-----------|
| CoNi-LDH                                                            | 1031 at 1 A g <sup>-1</sup>   | 50000, 88.2%      | 64.7% at 25 A g <sup>-1</sup>  | 49                        | 1         |
| NiCoMn-S-1.5                                                        | 657.7 at 1 A g <sup>-1</sup>  | 50000, 90%        | 51.61% at 50 A g <sup>-1</sup> | 36.3                      | 2         |
| Co <sub>9</sub> S <sub>8</sub>                                      | 926 at 1 A g <sup>-1</sup>    | 8000, 86%         | 67.4% at 15 A g <sup>-1</sup>  | 25.49                     | 3         |
| NiCo <sub>2</sub> S <sub>4</sub> /HMCSs                             | 659 at 1 A g <sup>-1</sup>    | 3000, 90.1%       | 53.4% at 10 A g <sup>-1</sup>  | 35.5                      | 4         |
| Co <sub>3</sub> S <sub>4</sub> /g-C <sub>3</sub> N <sub>4</sub> -10 | 415 at 0.5 A g <sup>-1</sup>  | 5000, 75.6%       | 54.5% at 10 A g <sup>-1</sup>  | 37.7                      | 5         |
| NiCoMn-S                                                            | 661 at 1 A g <sup>-1</sup>    | 1000, 86.45%      | 66.56% at 50 A g <sup>-1</sup> | 42.1                      | 6         |
| CoNi <sub>2</sub> S <sub>4</sub>                                    | 1158 at 1 A g <sup>-1</sup>   | 8500, 84%         | 60.8% at 10 A g <sup>-1</sup>  | 34.4                      | 7         |
| NiCo <sub>2</sub> S <sub>4</sub> /NGF                               | 558 at 1 A g <sup>-1</sup>    | 6000, 92.6%       | 55.5% at 20 A g <sup>-1</sup>  | 36.8                      | 8         |
| NF@CS10-ZC-LDH4                                                     | 1270.5 at 1 A g <sup>-1</sup> | 8000, 90.7 (3 E)  | 71.5% at 25A g <sup>-1</sup>   | 62.4                      | This work |

materials.

## References

1. Z. Li, H. Mi, F. Guo, C. Ji, S. He, H. Li and J. Qiu, Oriented Nanosheet-Assembled CoNi-LDH Cages with Efficient Ion Diffusion for Quasi-Solid-State Hybrid Supercapacitors, *Inorg. Chem.* 2021, **60**, 12197–12205.
2. J. Zhang, C. Li, M. Fan, T. Ma, H. Chen and H. Wang, Two-dimensional nanosheets constituted trimetal Ni-Co-Mn sulfide nanoflower-like structure for high-performance hybrid supercapacitors, *Appl. Surf. Sci.* 2021, **565**, 150482.

3. J. Li, Q. Li, J. Sun, Y. Ling, K. Tao and L. Han, Controlled Preparation of Hollow and Porous  $\text{Co}_9\text{S}_8$  Microplate Arrays for High-Performance Hybrid Supercapacitors, *Inorg. Chem.* 2020, **59**, 11174–11183.
4. Y. Liu, G. Jiang, Z. Huang, Q. Lu, B. Yu, U. Evariste and P. Ma, Decoration of Hollow Mesoporous Carbon Spheres by  $\text{NiCo}_2\text{S}_4$  Nanoparticles as Electrode Materials for Asymmetric Supercapacitors, *ACS Appl. Energy Mater.* 2019, **2**, 8079–8089
5. W. Li, Y. Li, C. Yang, Q. Ma, K. Tao and L. Han, Fabrication of 2D/2D nanosheet heterostructures of ZIF-derived  $\text{Co}_3\text{S}_4$  and  $\text{g-C}_3\text{N}_4$  for asymmetric supercapacitors with superior cycling stability, *Dalton Trans* 2020, **49**, 14017–14029.
6. J. Cao, Y. Hu, Y. Zhu, H. Cao, M. Fan, C. Huang, K. Shu, M. He and H. C. Chen, Synthesis of mesoporous nickel-cobalt-manganese sulfides as electroactive materials for hybrid supercapacitors, *Chem. Eng. J* 2021, **405**, 126928.
7. X. Zhao, Q. Ma, K. Tao and L. Han, ZIF-Derived Porous  $\text{CoNi}_2\text{S}_4$  on Intercrosslinked Polypyrrole Tubes for High-Performance Asymmetric Supercapacitors, *ACS Appl. Energy Mater.* 2021, **4**, 4199–4207.
8. Y. Chen, T. Liu, L. Zhang and J. Yu,  $\text{NiCo}_2\text{S}_4$  Nanotubes Anchored 3D Nitrogen-Doped Graphene Framework as Electrode Material with Enhanced Performance for Asymmetric Supercapacitors, *ACS Sustainable Chem. Eng.* 2019, **7**, 11157–11165.
